# Supplementary material
Source: Springer Nature journal article supplement (https://www.springermedizin.de/resource/supplementary/12865_2013_562_MOESM1_ESM.pdf/9428292)

**a**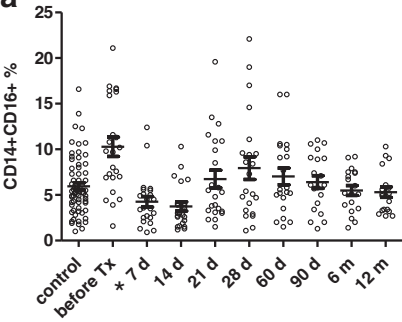**b**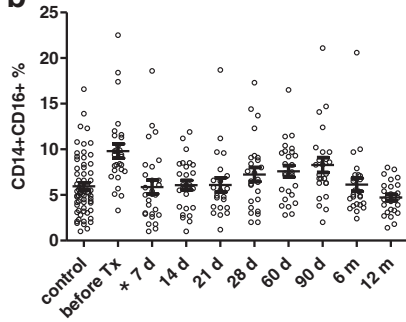**c**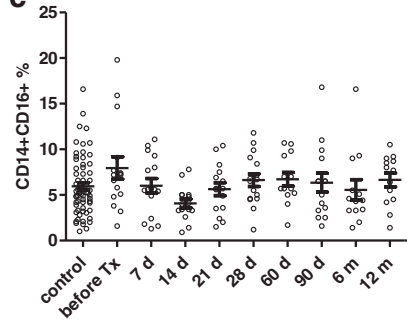

Supplement: MOESM1 [file 9428292]
